# Supplementary material for: Unraveling the role of aerosol transport on nanomaterial characterization by means single particle inductively coupled plasma mass spectrometry
Source: Royal Society of Chemistry journal article supplement (doi:10.1039/d3ja00134b), 2023-01-01
Supplement: d3ja00134b1.pdf [file d3ja00134b1.pdf]

## Appendix. Supplementary data

### Unraveling the role of aerosol transport on nanomaterial characterization by means single particle inductively coupled plasma mass spectrometry

Daniel Torregrosa, Guillermo Grindlay, Luis Gras, Juan Mora

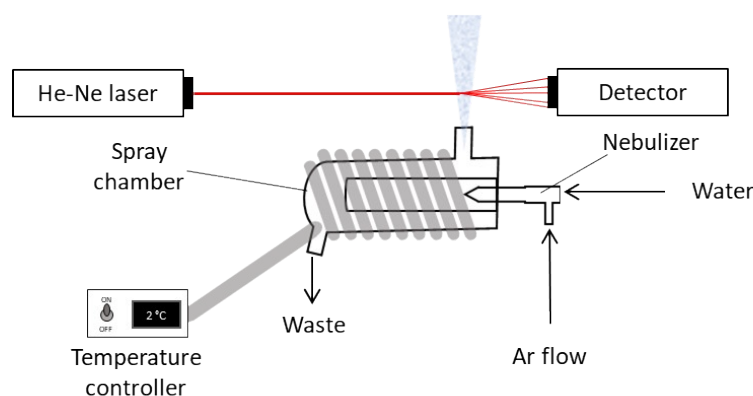

**Figure S1.** Experimental setup used for characterizing tertiary aerosol by means laser Fraunhofer diffraction.  $Q_g$  0.7-0.9-1.1 L min<sup>-1</sup>.  $Q_l$  100-300-500 μL min<sup>-1</sup>.

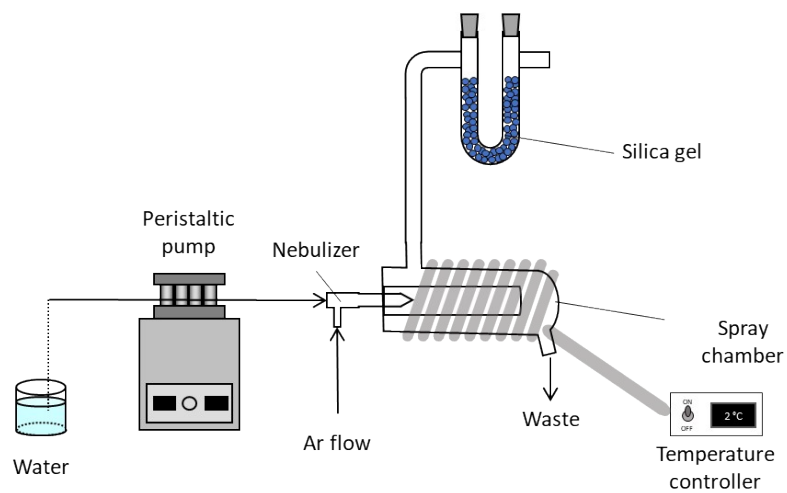

**Figure S2.** Experimental setup used for solvent transport measurements.  $Q_g$  0.7-0.9-1.1 L  $\text{min}^{-1}$ ;  $Q_l$  100-300-500  $\mu\text{L min}^{-1}$ .

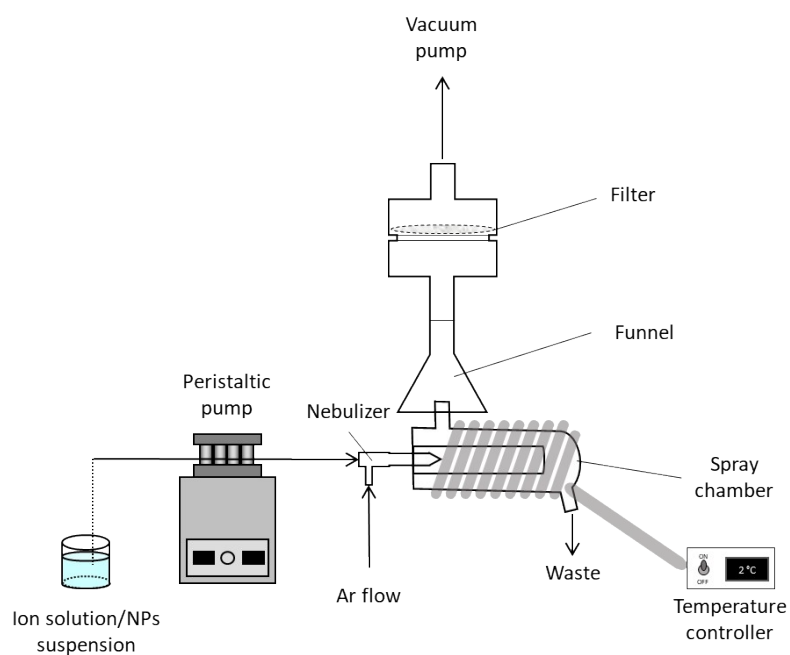

**Figure S3.** Experimental setup used for analyte transport measurements.  $Q_g$  0.7-0.9-1.1 L  $\text{min}^{-1}$ .  $Q_l$  100-300-500  $\mu\text{L min}^{-1}$ . Ionic Pt concentration 10  $\mu\text{g mL}^{-1}$ . Platinum NPs number concentration  $9 \cdot 10^6 \text{ mL}^{-1}$ .

**A**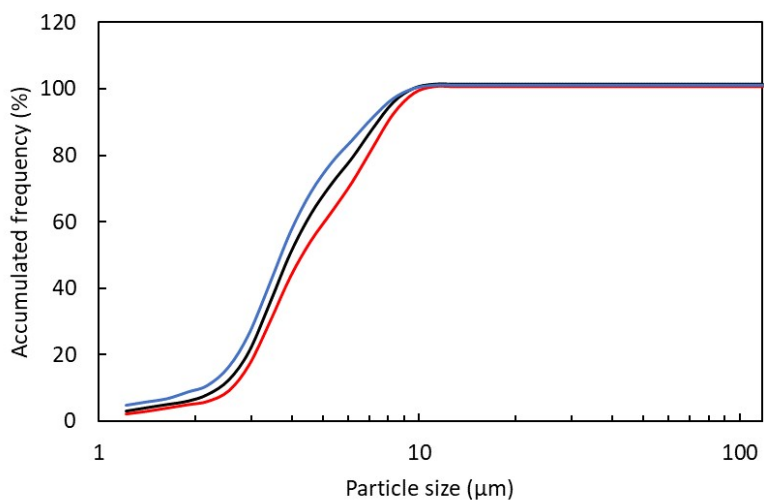**B**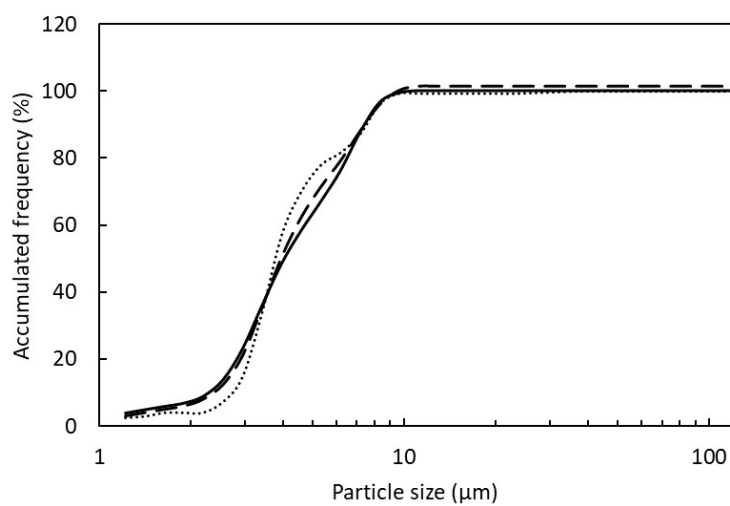

**Figure S4.** Tertiary aerosol drop size distribution obtained operating (A)  $Q_i$  300  $\mu\text{L min}^{-1}$  and  $Q_g$  0.7 (red line), 0.9 (black line) or 1.1  $\text{L min}^{-1}$  (blue line); or (B)  $Q_g$  0.9  $\text{L min}^{-1}$  and  $Q_i$  100 (dotted line), 300 (dashed line) or 500  $\mu\text{L min}^{-1}$  (continuous line).

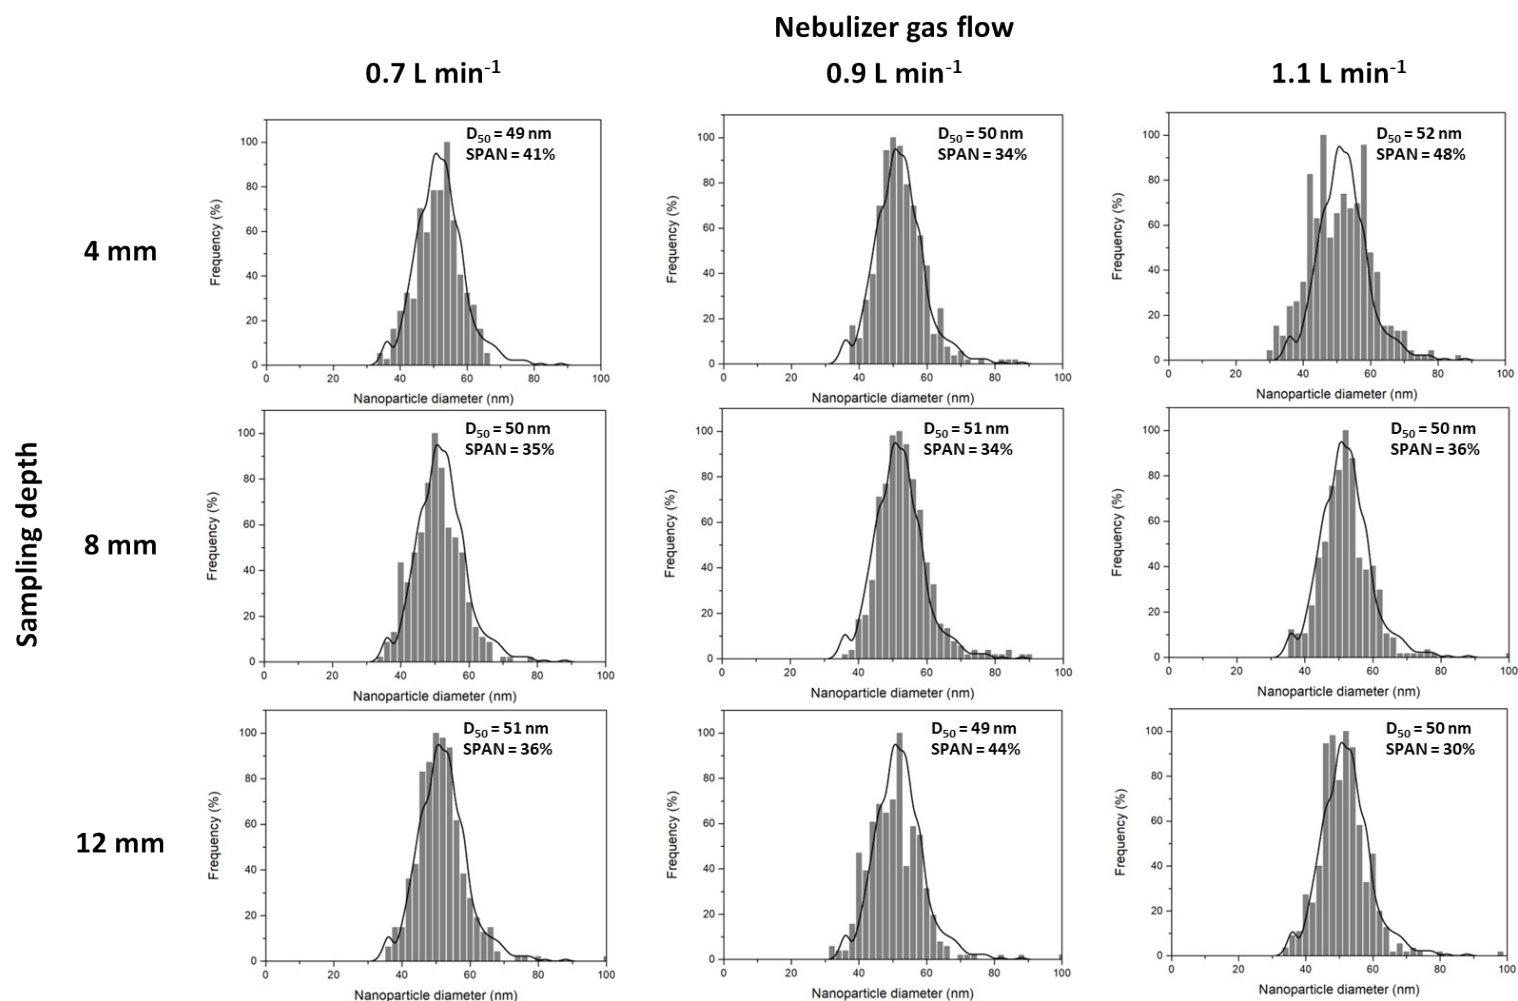

**Figure S5.** 50 nm AuNPs size distribution obtained using transport efficiencies calculated by means the number of events method under different operating conditions. R.f. power 1550 W; Q<sub>1</sub> 300  $\mu$ L min<sup>-1</sup>. AuNPs concentration:  $3.5 \cdot 10^4$  mL<sup>-1</sup>. Continuous line represents TEM particle size distributions.

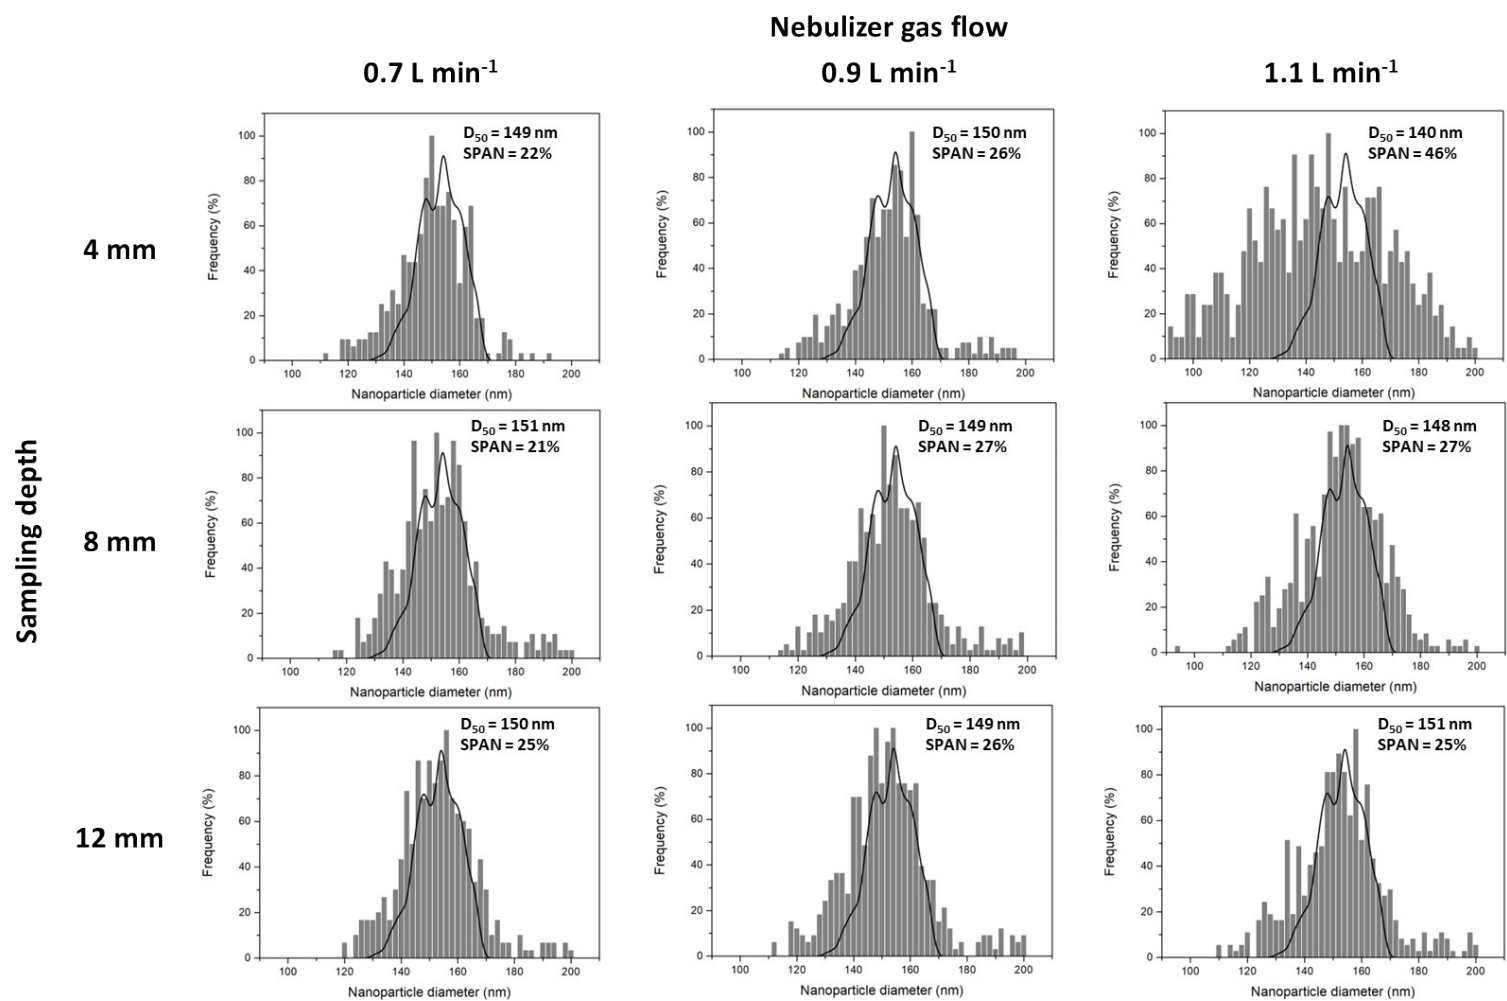

**Figure S6.** 150 nm AuNPs size distribution obtained using transport efficiencies calculated by means the number of events method under different operating conditions. R.f. power 1550 W; Q<sub>l</sub> 300 μL min<sup>-1</sup>. AuNPs concentration: 3.6·10<sup>4</sup> mL<sup>-1</sup>. Continuous line represents TEM particle size distributions.

**A**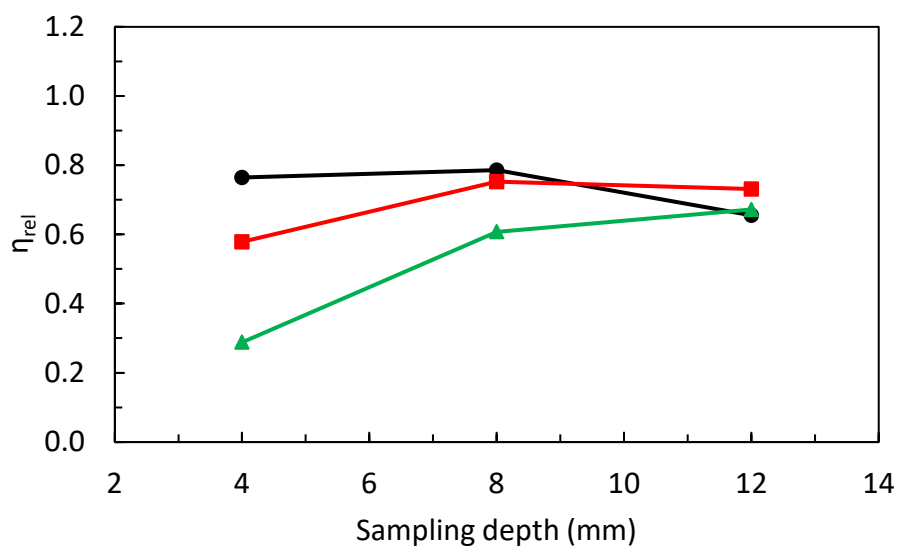**B**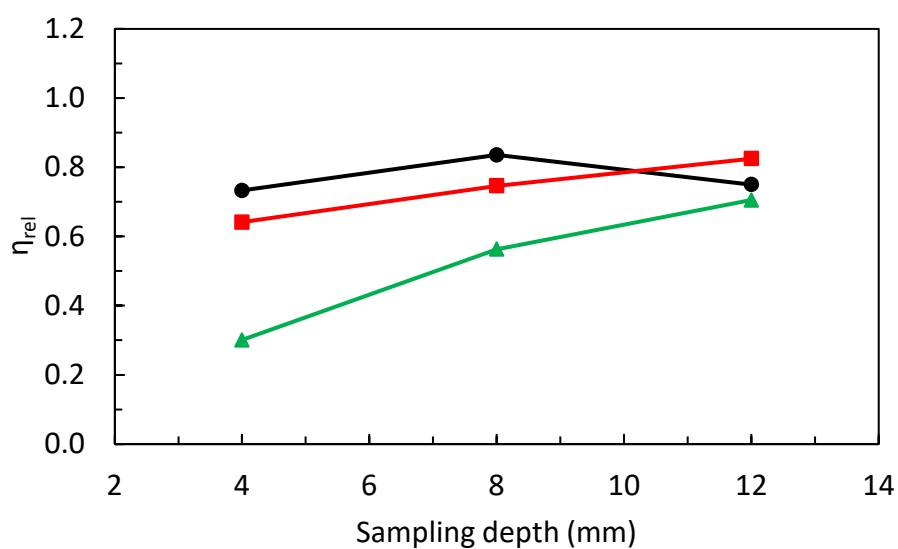

**Figure S7.** Influence of the SD on the transport efficiency ratio between number of events and ionic and NMs signal ratio methodologies ( $\eta_{rel}$ ) for (A) 50 AuNPs and (B) 150 nm AuNPs operating different  $Q_g$  values.  $Q_g$ : 0.7 L min<sup>-1</sup> (●), 0.9 L min<sup>-1</sup> (■), and 1.1 L min<sup>-1</sup> (▲). R.f. power: 1550 W;  $Q_i$ : 300  $\mu$ L min<sup>-1</sup>.

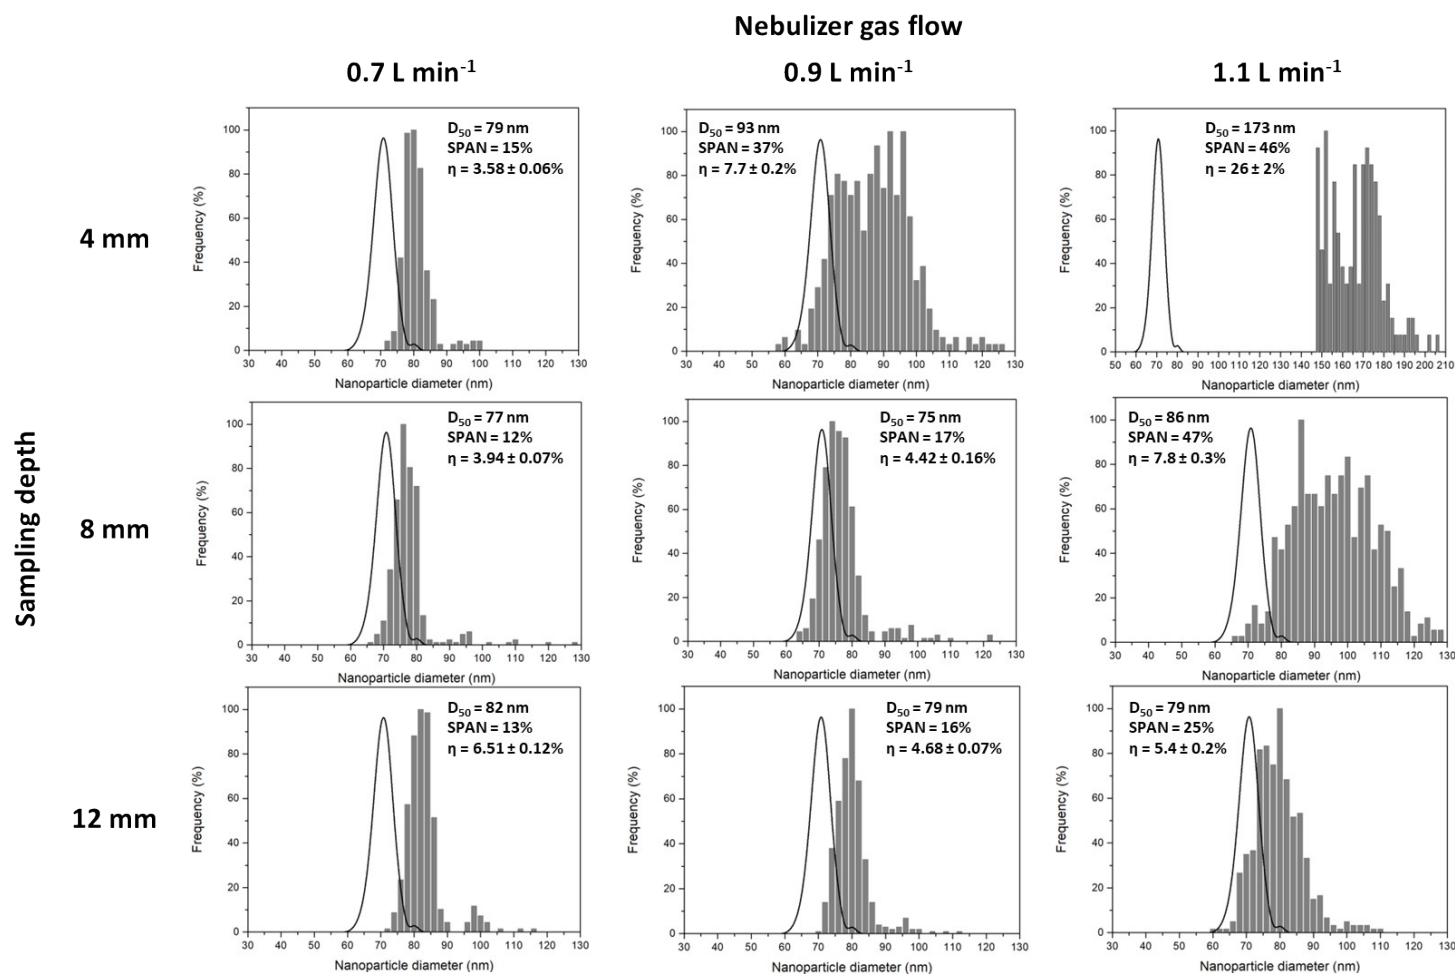

**Figure S8.** Platinum NPs size distribution obtained using transport efficiencies calculated by means the ionic and NMs signal method under different operating conditions. R.f. power 1550 W;  $Q_i$  300  $\mu\text{L min}^{-1}$ . PtNPs concentration:  $1.5 \cdot 10^4 \text{ mL}^{-1}$ . Continuous line represents TEM particle size distributions.



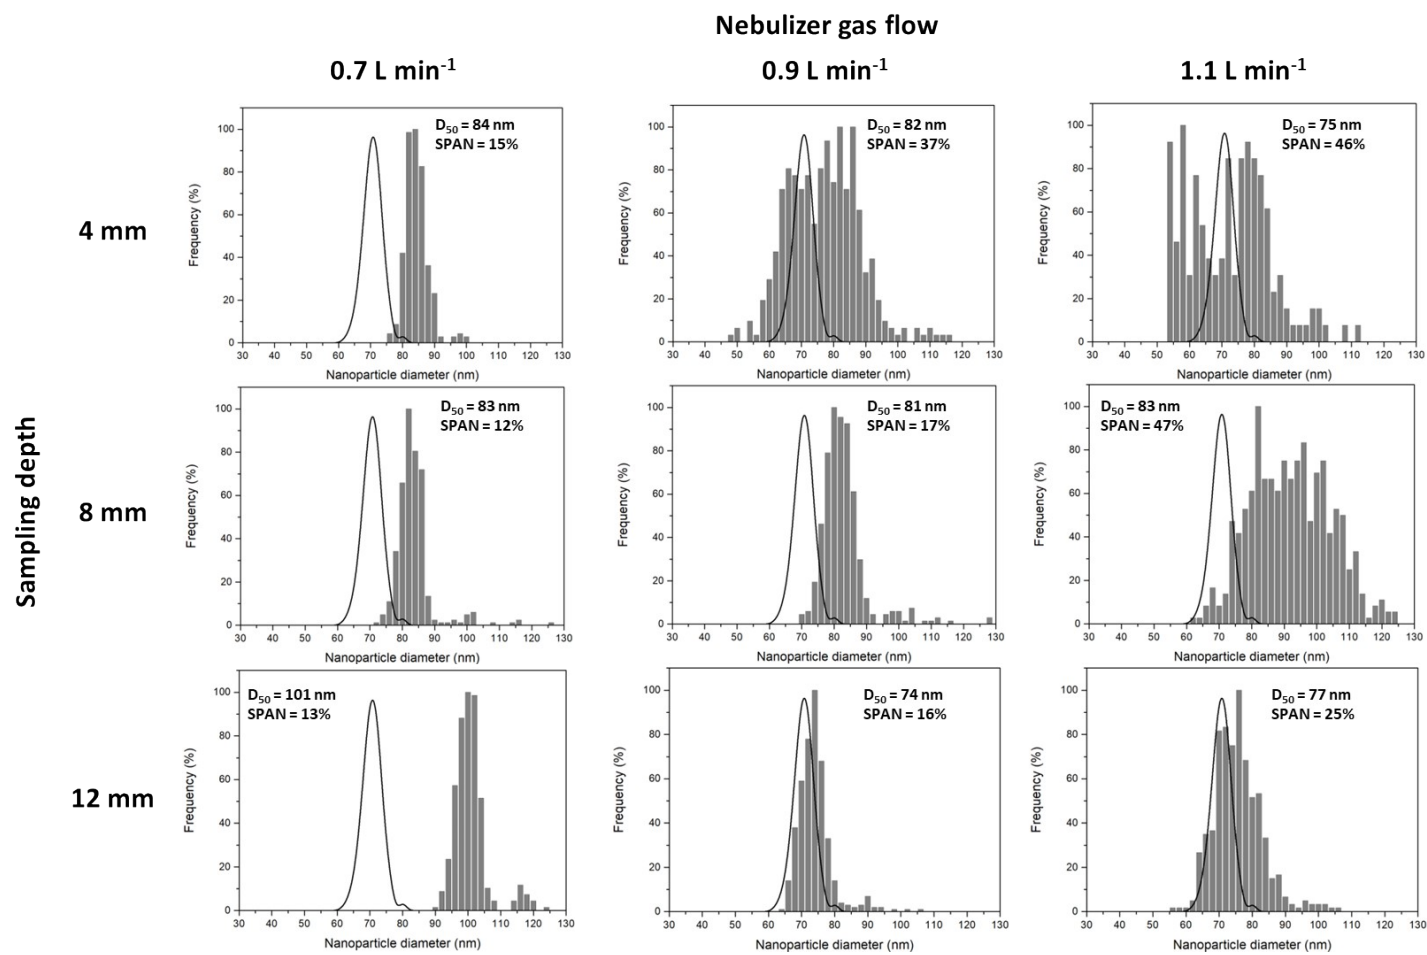

**Figure S9.** Platinum NPs size distributions obtained using transport efficiencies calculated by means solvent transport efficiency under different operating conditions. R.f. power 1550 W; Q<sub>i</sub> 300 μL min<sup>-1</sup>. PtNPs concentration: 1.5·10<sup>4</sup> mL<sup>-1</sup>. Continuous line represents TEM particle size distributions
